# Supplementary material
Source: publisher site journal article supplement (http://www.degruyter.com/publication/journal_key/EPOLY/downloadAsset/EPOLY_Article%20Processing%20Charges.pdf)
Supplement: Supplementary file 1 [file EPOLY_Article%20Processing%20Charges.pdf]

## ARTICLE PROCESSING CHARGES

In order to sustain the production of our fully-refereed open access journal, each article accepted for publication in e-Polymers is subject to an Article Processing Charge of €1500. This fee is used to cover the costs of the peer-review process, professional typesetting and copyediting, as well as online hosting, long-term preservation, content aggregators worldwide, and extensive promotion to potential readers.

Editors and reviewers are not involved in author payment process and do not discuss charges with authors.

The ability to pay does not influence whether or not a manuscript is accepted for publication.

Information regarding payment of these charges will be provided following acceptance for publication. There are no submission charges – Article Processing Charges apply after the acceptance of a manuscript. Inquiries concerning Article Processing Charges should be addressed before or immediately after submission of a paper to the Editorial Office.

## WAIVER POLICIES

If the submitting author is affiliated with an organization which has an open access agreement with De Gruyter, the article processing charges (APCs) may be covered or discounted. Moreover, all authors can apply for a discount or a waiver during the submission process. Authors are asked to contact the journal Editorial Office before, or straight after submitting their article. All inquiries concerning Article Processing Charges should be addressed before submitting a paper to the Managing Editor at the email address: [epolymers.editorial@degruyter.com](mailto:epolymers.editorial@degruyter.com)

## FUNDING OPPORTUNITIES

Authors who are looking for funds to support the payment of Article Processing Charges have a number of options to consider. For details visit our [website](#).

## EDITORIAL OFFICE

Managing Editor

Dr. Jan Barabach

De Gruyter Poland Ltd.

Bogumiła Zuga 32A

01-811 Warsaw / Poland

Tel: +48 22 701 50 15

Email: [Jan.Barabach@degruyter.com](mailto:Jan.Barabach@degruyter.com)

[www.opengeosciences.com](http://www.opengeosciences.com)
